# Supplementary material
Source: PubMed Central journal article supplement (PMC10592209)
Supplement: NIHMS1923029-supplement-4.pdf [file NIHMS1923029-supplement-4.pdf]

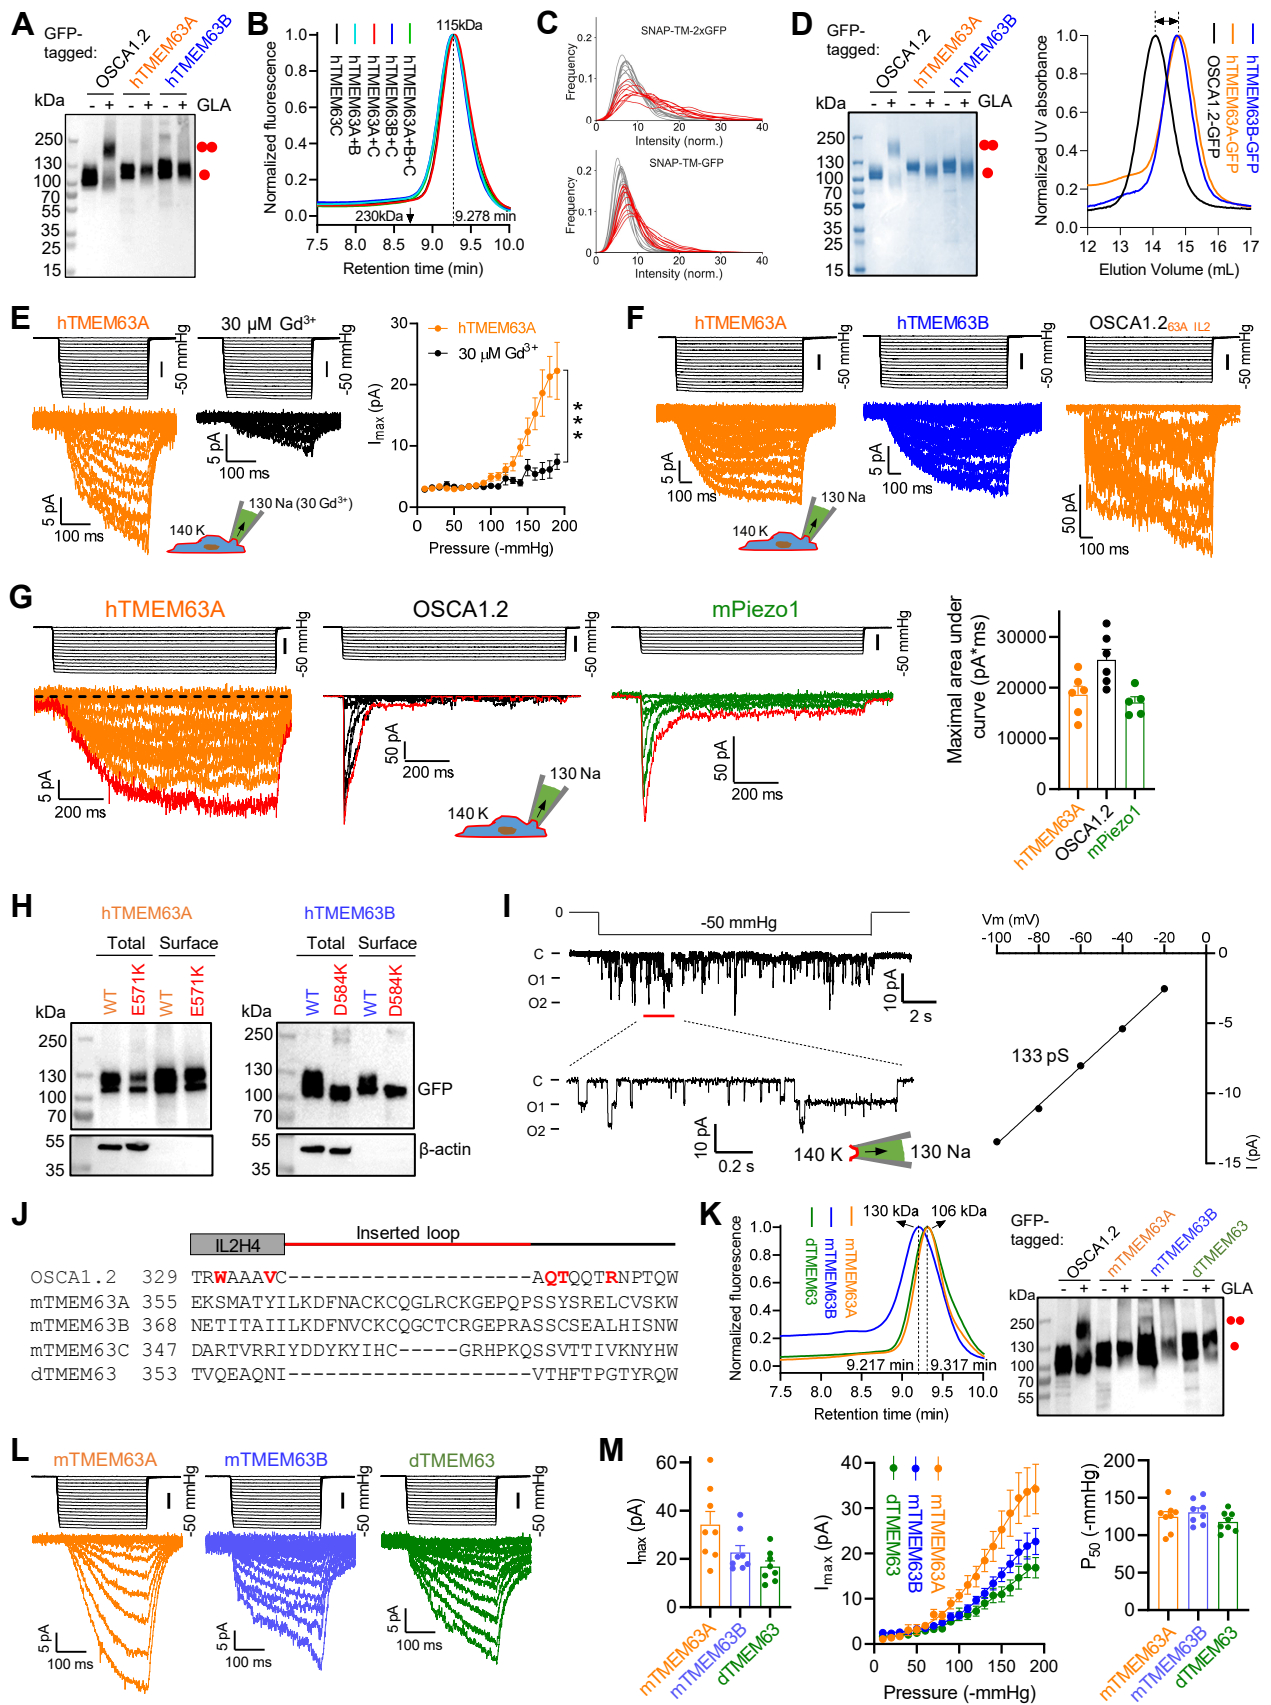

**Figure S1. Biochemical and electrophysiological analyses of TMEM63 and OSCA1.2 proteins, related to Figures 1, 4 and 5.**

(A) Representative western blot of HEK293T cell lysate with overexpression of GFP-tagged OSCA1.2, hTMEM63A or hTMEM63B. The cell lysate was treated with or without 10 mM GLA.

(B) Representative FSEC traces of HEK293T cell lysate containing expression of C-terminal GFP-tagged hTMEM63C or indicated co-expression. Retention time corresponding to a potential homo- or heterodimer (around 230 kDa without GFP) is marked.

(C) Intensity distribution before (red) and after (gray) photobleaching for control proteins with a monomeric transmembrane (TM) domain, and either one or two GFP tags fused to their intracellular C-termini. The control proteins also contain an N-terminal SNAP tag.

(D) *Left*, coomassie-blue staining of purified OSCA1.2, human TMEM63A and TMEM63B with a C-terminal GFP-tag after SDS-PAGE. Proteins were treated with or without 10 mM GLA; *Right*, representative SEC traces of indicated purified proteins. The UV absorbance is normalized to the peak amplitude for a better comparison.

(E) *Left*, representative stretch-activated current traces from TMEM63A-expressing HEK293T cells in the absence or presence of 30  $\mu\text{M}$   $\text{Gd}^{3+}$  in the pipette solution; *Right*, quantification of  $I_{\text{max}}$  at various negative pressures in the absence (N = 7) or presence of  $\text{Gd}^{3+}$  (N = 7). \*\*\* $p < 0.001$ . Two-way ANOVA analysis.

(F) Representative stretch-activated current traces with prolonged application of negative pressures (1 s).

(G) *Left*, representative traces of stretch-activated currents in HEK293T cells with overexpression of hTMEM63A, OSCA1.2 or mouse Piezo1; *Right*, quantification of the maximal area under the current traces, which represents the number of conducted charges.

(H) Biotinylation assay detecting both the total expression and cell surface expression of hTMEM63A WT and E571K mutant (*Left*) or hTMEM63B WT and D584K mutant (*Right*) in HEK293T cells.

(I) *Left*, representative trace of single-channel recordings of OSCA1.2 reconstituted in liposomes. The voltage was held at -50 mV. Closed (C) and open (O) states are indicated; *Right*, current-voltage relationship of stretch-activated single-channel currents. The calculated single-channel conductance is shown.

(J) Sequence alignment of the region within IL2 that mediates dimerization of OSCA1.2. Residues that directly mediate OSCA1.2 dimerization are highlighted in red. The inserted loop in TMEM63s is indicated by the red line.

(K) Representative FSEC traces (*Left*) or western blot (*Right*) of HEK293T cell lysate with overexpression of GFP-tagged mouse TMEM63A (mTMEM63A), TMEM63B (mTMEM63B) or *Drosophila melanogaster* TMEM63 (dTMEM63). Cell lysates were treated without (-) or with (+) 10 mM GLA.

(L) Representative traces of stretch-activated currents (-80 mV) from HEK293T cells with overexpression of mTMEM63A, mTMEM63B or dTMEM63.

(M) Quantification of  $I_{\text{max}}$  (*Left*) and  $P_{50}$  (*Right*) from each individual patches; *Middle*, averaged pressure-response current curves fitted with a Boltzmann equation (mTMEM63A, N = 8; mTMEM63B, N = 8; dTMEM63, N = 8).

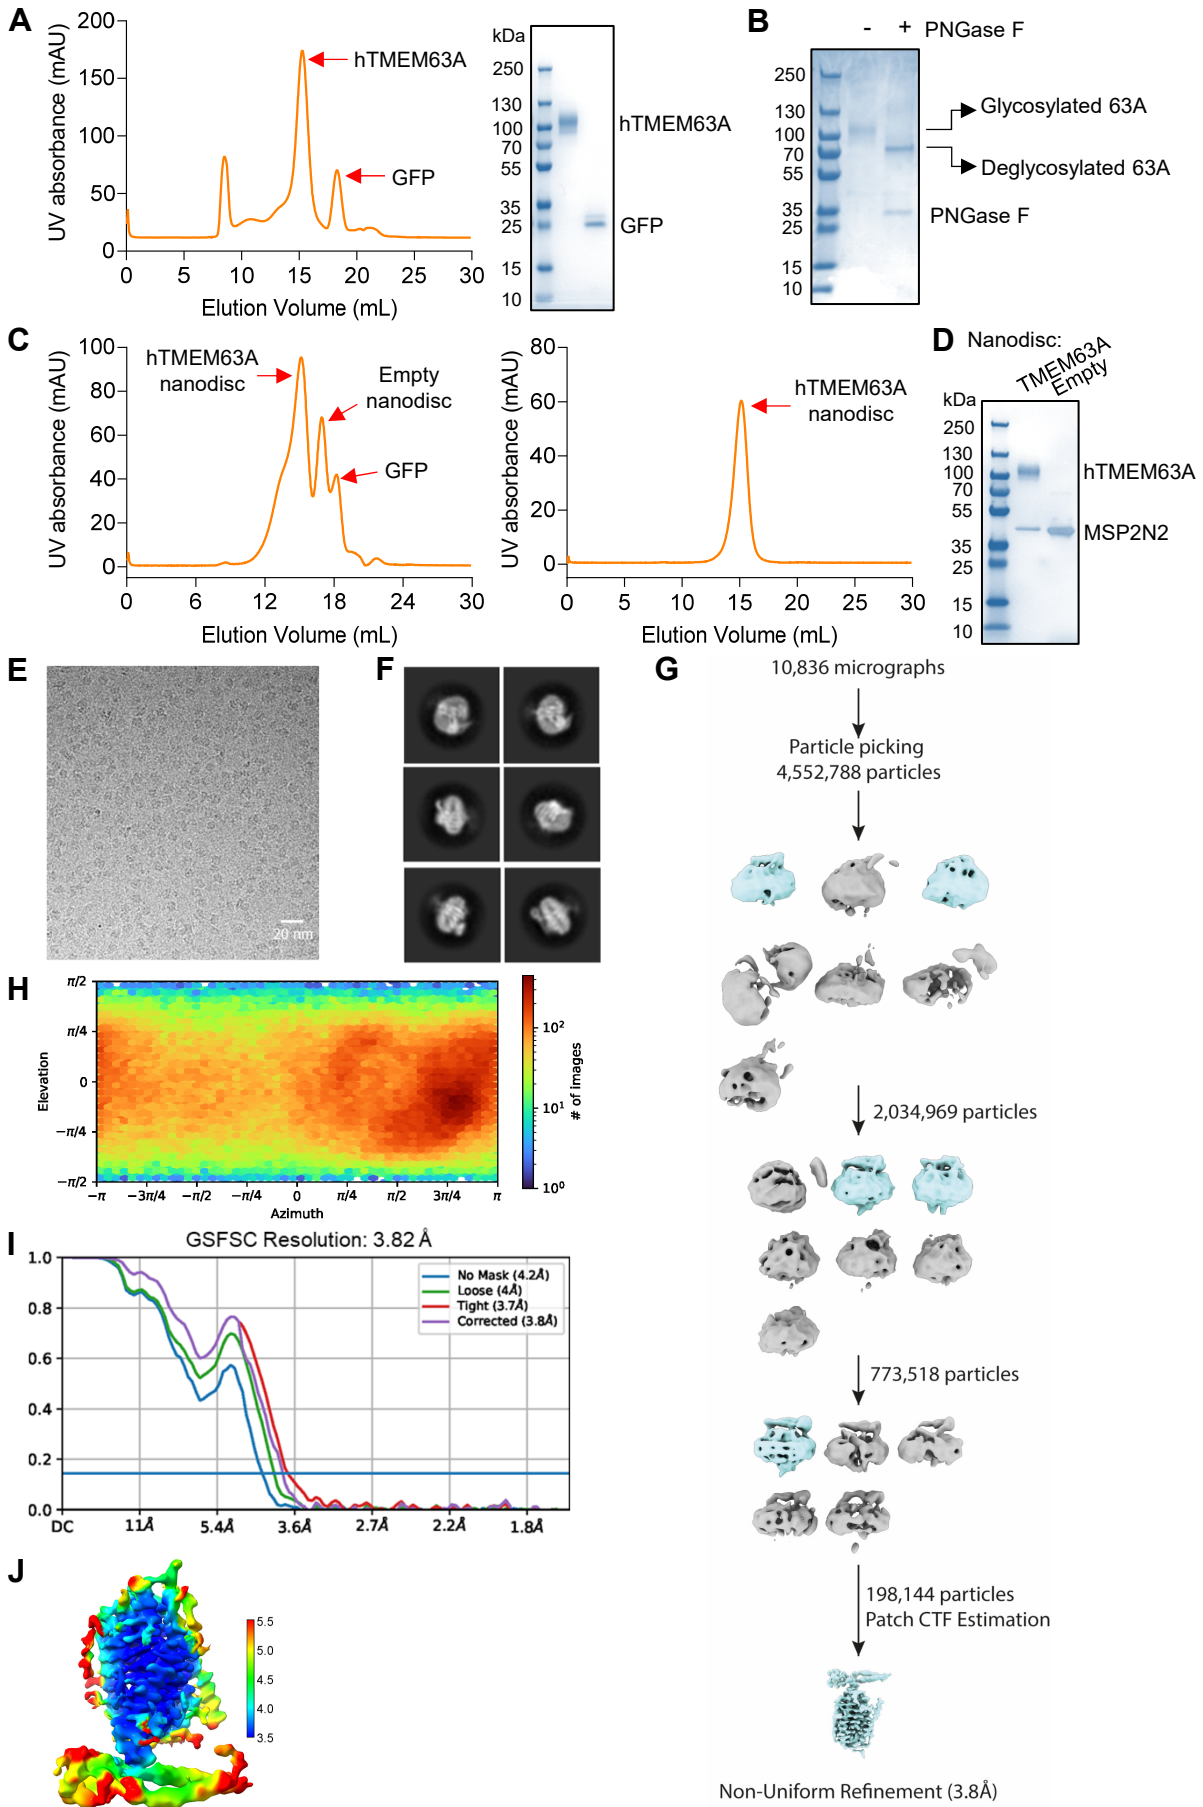

**Figure S2. Purification and reconstruction of human TMEM63A, related to Figure 2.**

(A) *Left*, representative SEC trace of purified human TMEM63A protein in LMNG/CHS, treated with 3C protease to cleave GFP. The peak fractions corresponding to hTMEM63A and GFP are indicated; *Right*, SDS-PAGE gel staining of hTMEM63A and GFP peak fractions.

(B) SDS-PAGE gel staining of hTMEM63A peak fraction treated without or with PNGase F. Glycosylated and deglycosylated hTMEM63A are indicated.

(C) *Left*, SEC trace of hTMEM63A reconstituted in lipid nanodiscs with MSP2N2; *Right*, SEC trace of hTMEM63A nanodisc peak fraction collected from the *left* panel.

(D) SDS-PAGE gel staining of peak fractions of hTMEM63A nanodiscs and empty nanodiscs.

(E and F) Representative cryo-EM raw image (E) and 2D-class averages (F) of hTMEM63A in nanodiscs.

(G) Cryo-EM data processing flowchart for nanodisc-embedded hTMEM63A density map.

(H) Angular distribution of reconstructed particles in the final map of hTMEM63A.

(I) FSC plots of unmasked and masked maps.

(J) Final reconstruction map colored by local resolution.

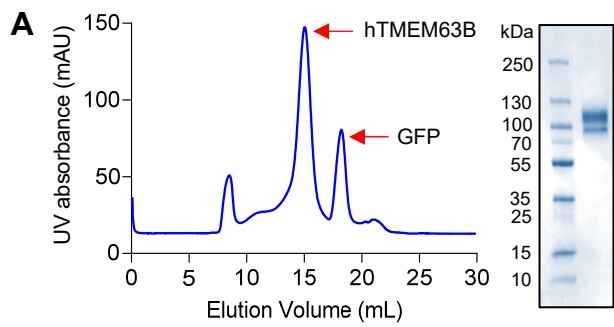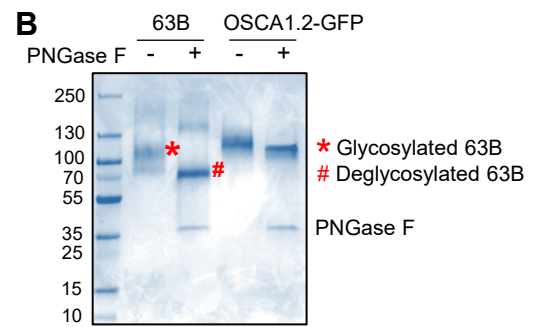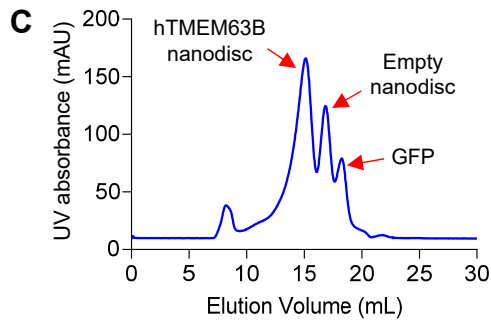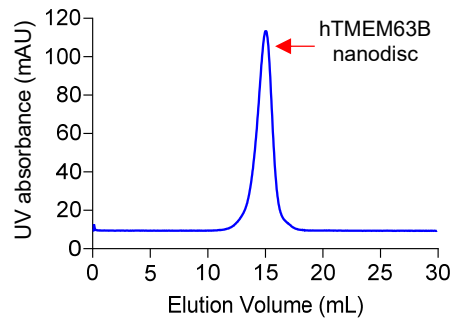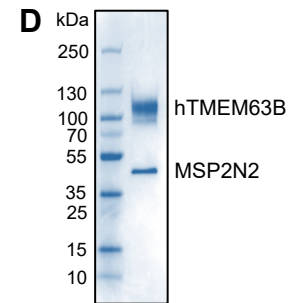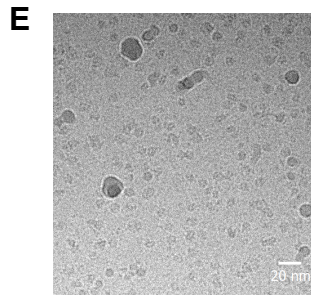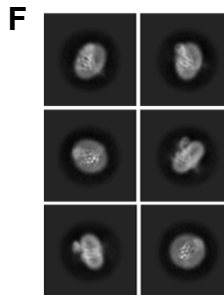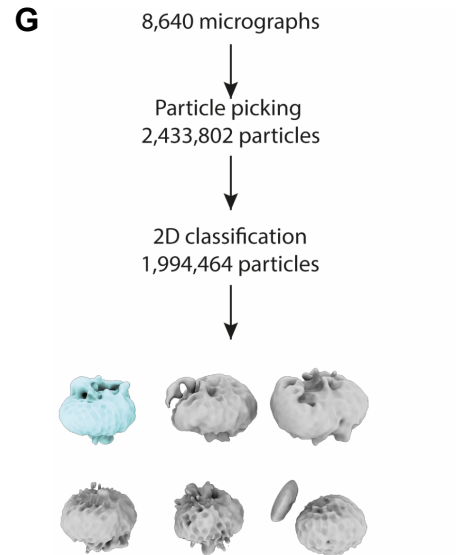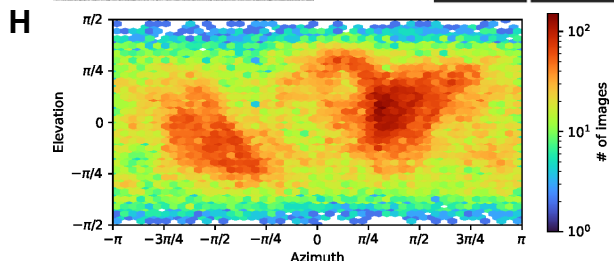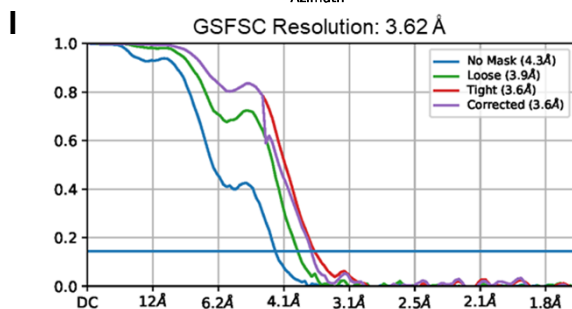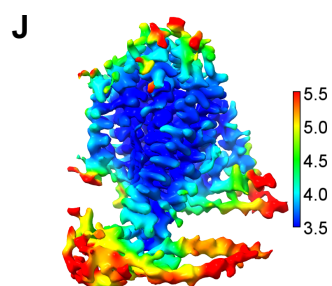

**Figure S3. Purification and reconstruction of human TMEM63B, related to Figure 2.**

(A) SEC trace of purified human TMEM63B protein in LMNG/CHS. GFP was cleaved by 3C protease treatment. The hTMEM63B peak fraction was examined by SDS-PAGE.

(B) SDS-PAGE gel staining of purified hTMEM63B and OSCA1.2-GFP treated without or with PNGase F. Glycosylated and deglycosylated hTMEM63B are indicated.

(C) *Left*, SEC trace of hTMEM63B reconstituted in lipid nanodiscs with MSP2N2; *Right*, SEC trace of hTMEM63B nanodisc peak fraction collected from the *left* panel.

(D) SDS-PAGE gel staining of the hTMEM63B nanodisc peak fraction.

(E and F) Representative cryo-EM raw image (E) and 2D-class averages (F) of hTMEM63B in LMNG/CHS.

(G) Cryo-EM data processing flowchart for the map of hTMEM63B in LMNG/CHS.

(H) Angular distribution of reconstructed particles in the final map of hTMEM63B.

(I) FSC plots of unmasked and masked maps.

(J) Final reconstruction map colored by local resolution.

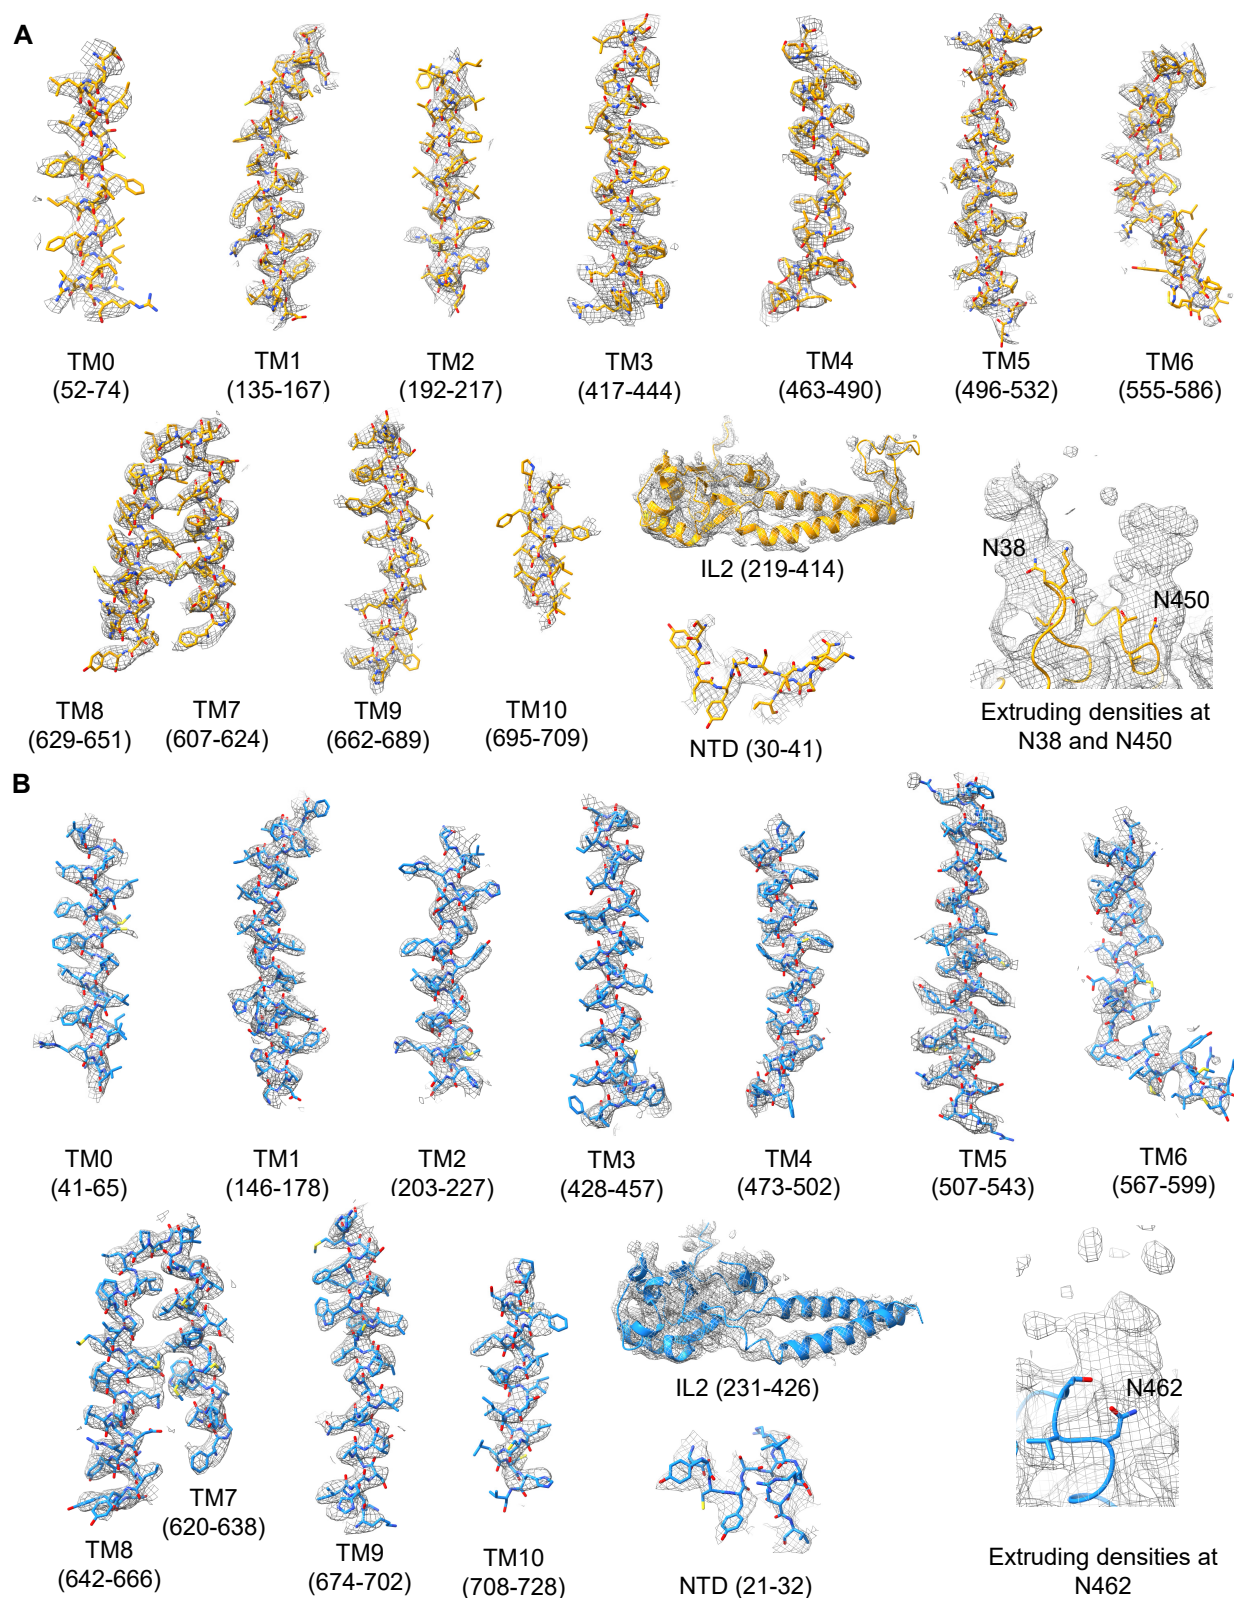

**Figure S4. Cryo-EM density and fit with models of TMEM63s, related to Figure 2.**

(A and B) Selected regions of cryo-EM map of TMEM63A in nanodiscs (A) and TMEM63B in LMNG (B) superimposed with the atomic models.

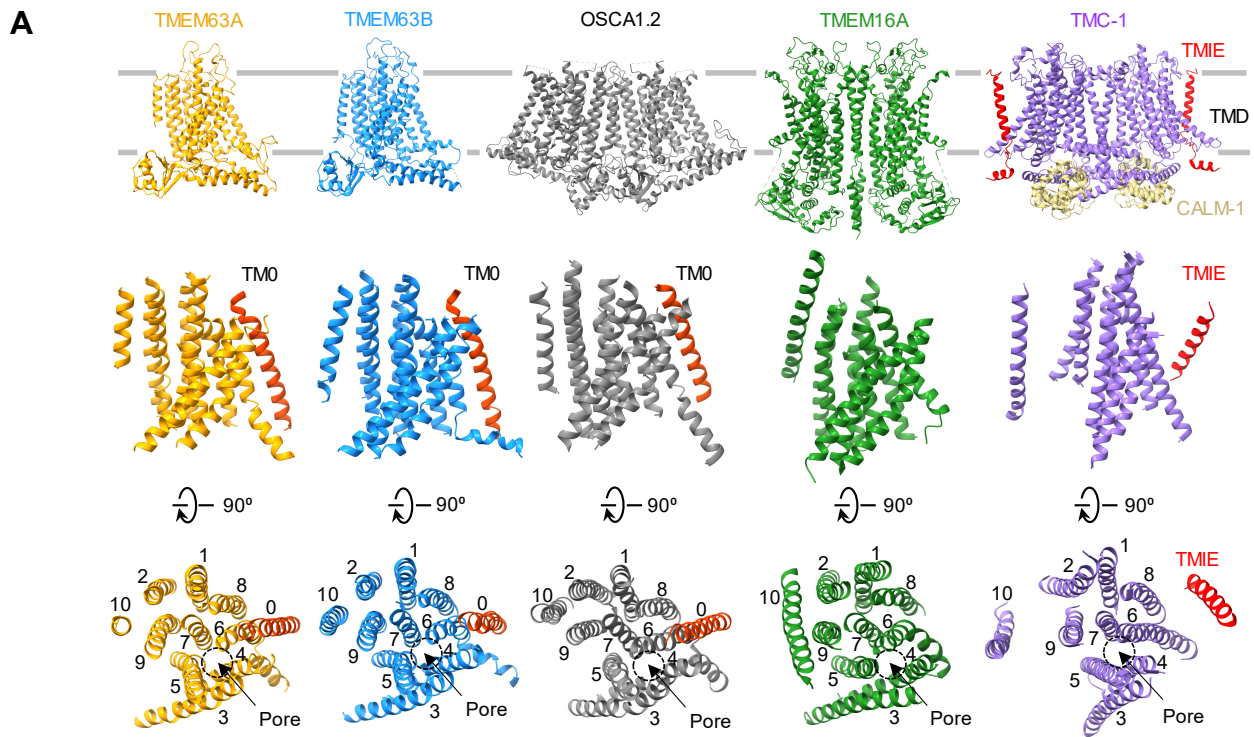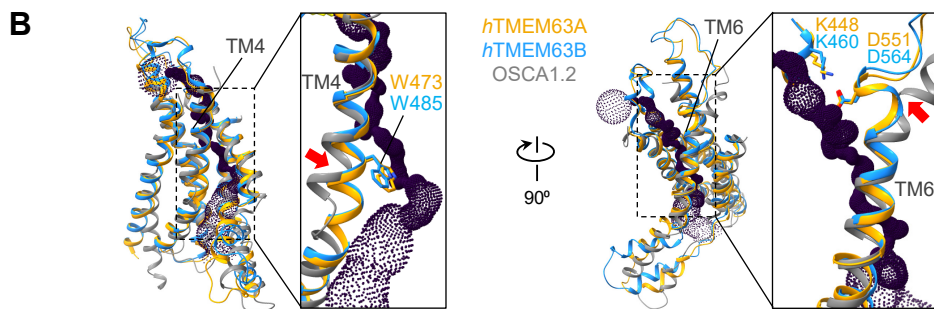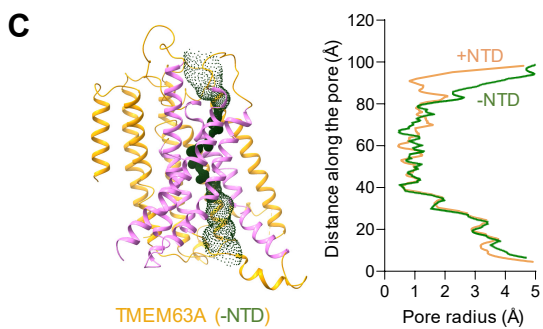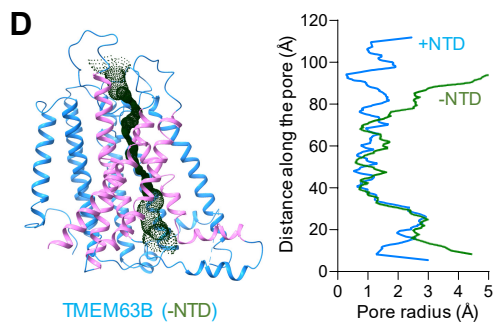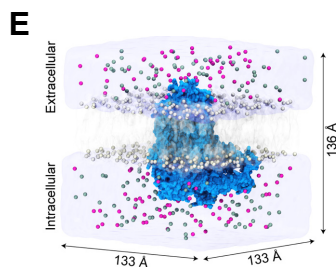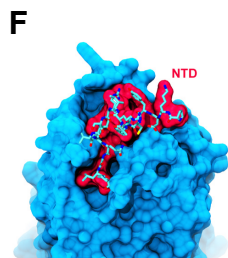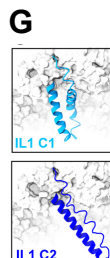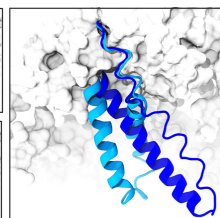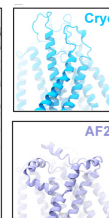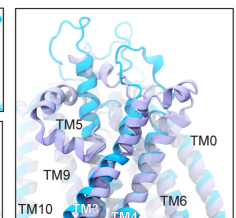



**Figure S5. Structural comparisons and ion permeation pore analysis, related to Figures 3.**

(A) Comparison of TMDs. *Upper*, side view of ribbon structures of human TMEM63A, human TMEM63B, *Arabidopsis thaliana* OSCA1.2 (PDB: 6MGV), mouse TMEM16A (PDB: 5OYG) and *C. elegans* TMC1 bound with TMIE and CALM-1 (PDB: 7USX). *Middle*, side-view of ribbon structures of TMD isolated from TMEM63A, TMEM63B, OSCA1.2, TMEM16A and TMC-1. The TM0 in TMEM63A, TMEM63B and OSCA1.2 and TMIE is highlighted in red. *Lower*, top view of the TMD with the location of putative ion permeation pore indicated.

(B) Structural comparisons of the pore domain among TMEM63A, TMEM63B and OSCA1.2 (PDB: 6MGV). The noticeable differences in TM4 and TM6 were highlighted.

(C and D) Effects of NTD on the ion permeation pore profile in TMEM63A and TMEM63B. *Left*, ribbon structures of TMEM63A (C) and TMEM63B (D) without the NTD (S30-V45 in TMEM63A; P19-L36 in TMEM63B). The calculated pore profile is shown as green dots. Pore lining TMs are colored in magenta; *Right*, pore radii of TMEM63A (C) and TMEM63B (D) with (+NTD) and without NTD (-NTD) against distance along the pore.

(E) All-atom MD simulation setup for TMEM63B in a POPC membrane (Sim1a). Protein is shown in surface representation. Chloride and potassium ions are in dark green and pink, respectively. Lipid phosphates are white spheres and water is in transparent blue surface.

(F) Highlight of TMEM63B NTD, removed in some simulations.

(G) Two predicted conformations for IL1.

(H) Experimentally derived (Cryo) and AlphaFold2 predicted (AF2) conformations of extracellular regions of TM3-TM4 and TM5-TM6. Other helices (e.g., TM0, TM9, TM10) have matching conformations.

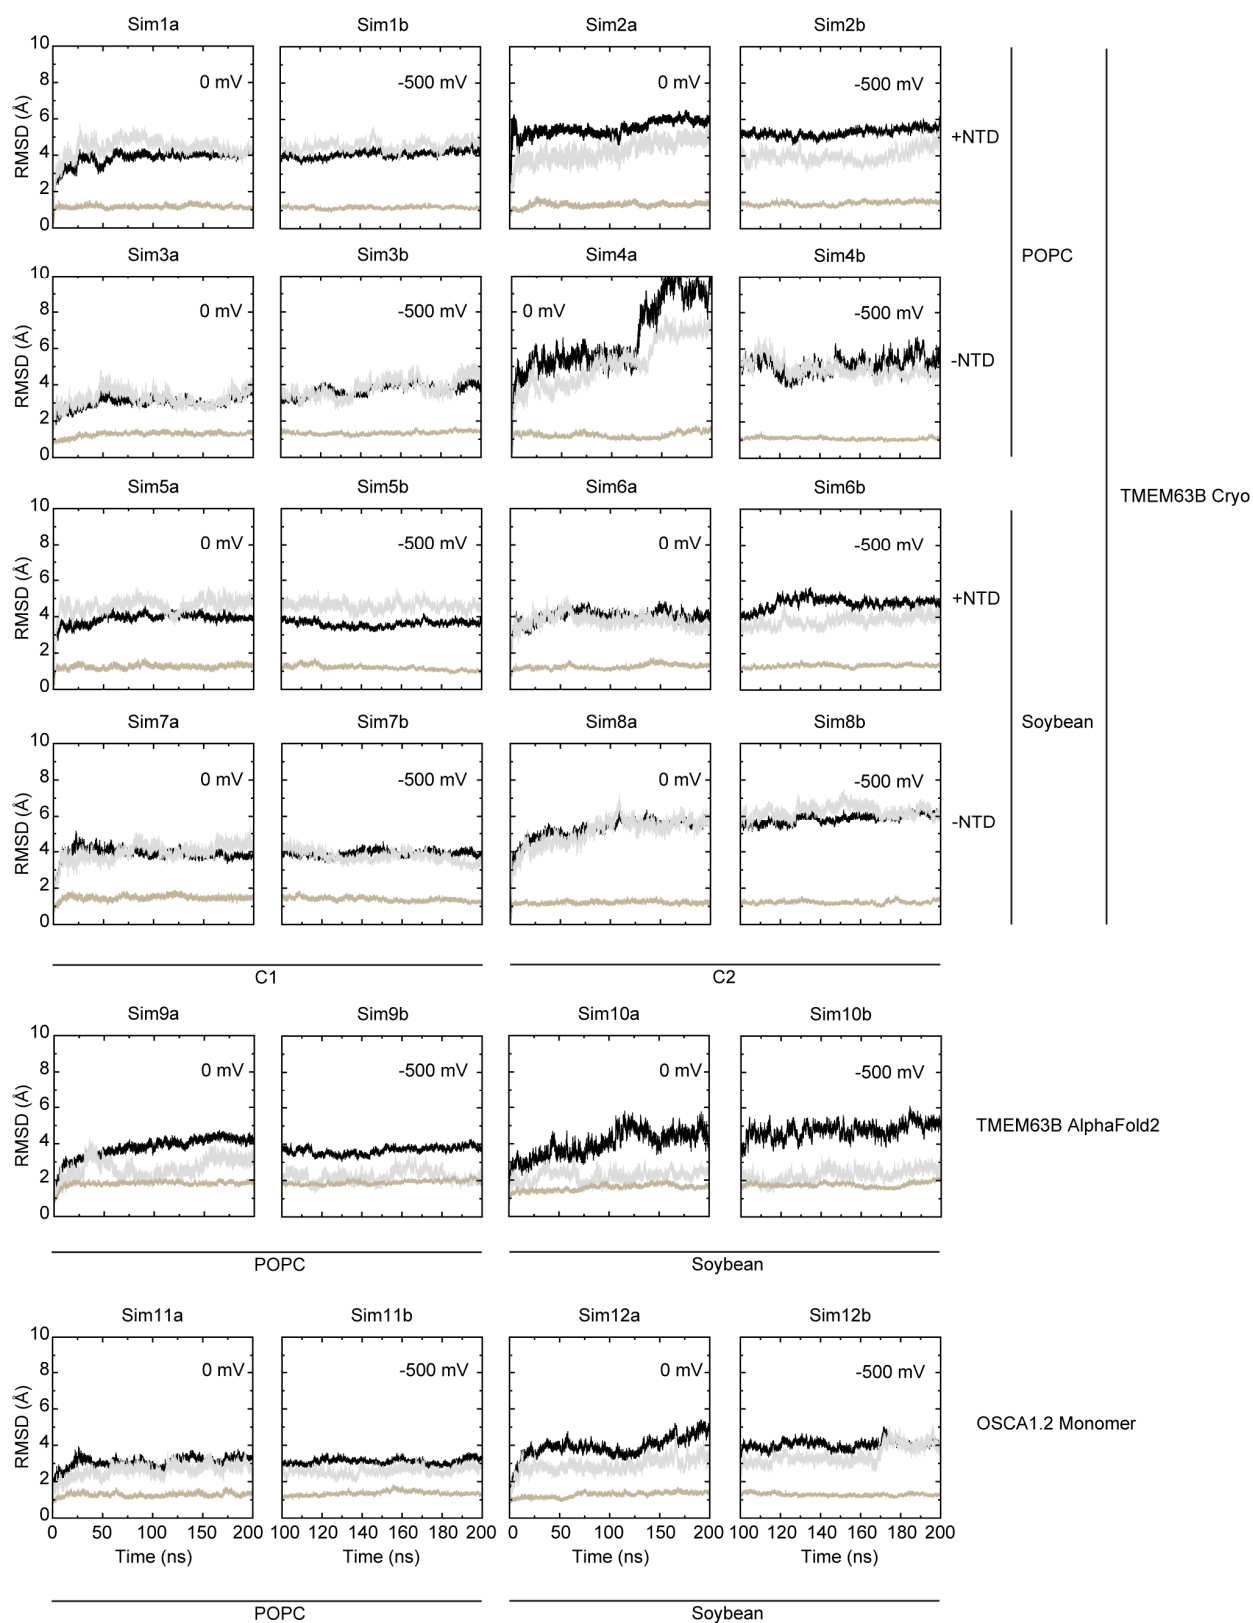

**Figure S6. Domain stability in simulations, related Figure 3.**

RMSD values for all simulations in Table S2 computed using  $C\alpha$  atoms of the entire protein (black), of the IL2 (gray), and of the TMD (tan).

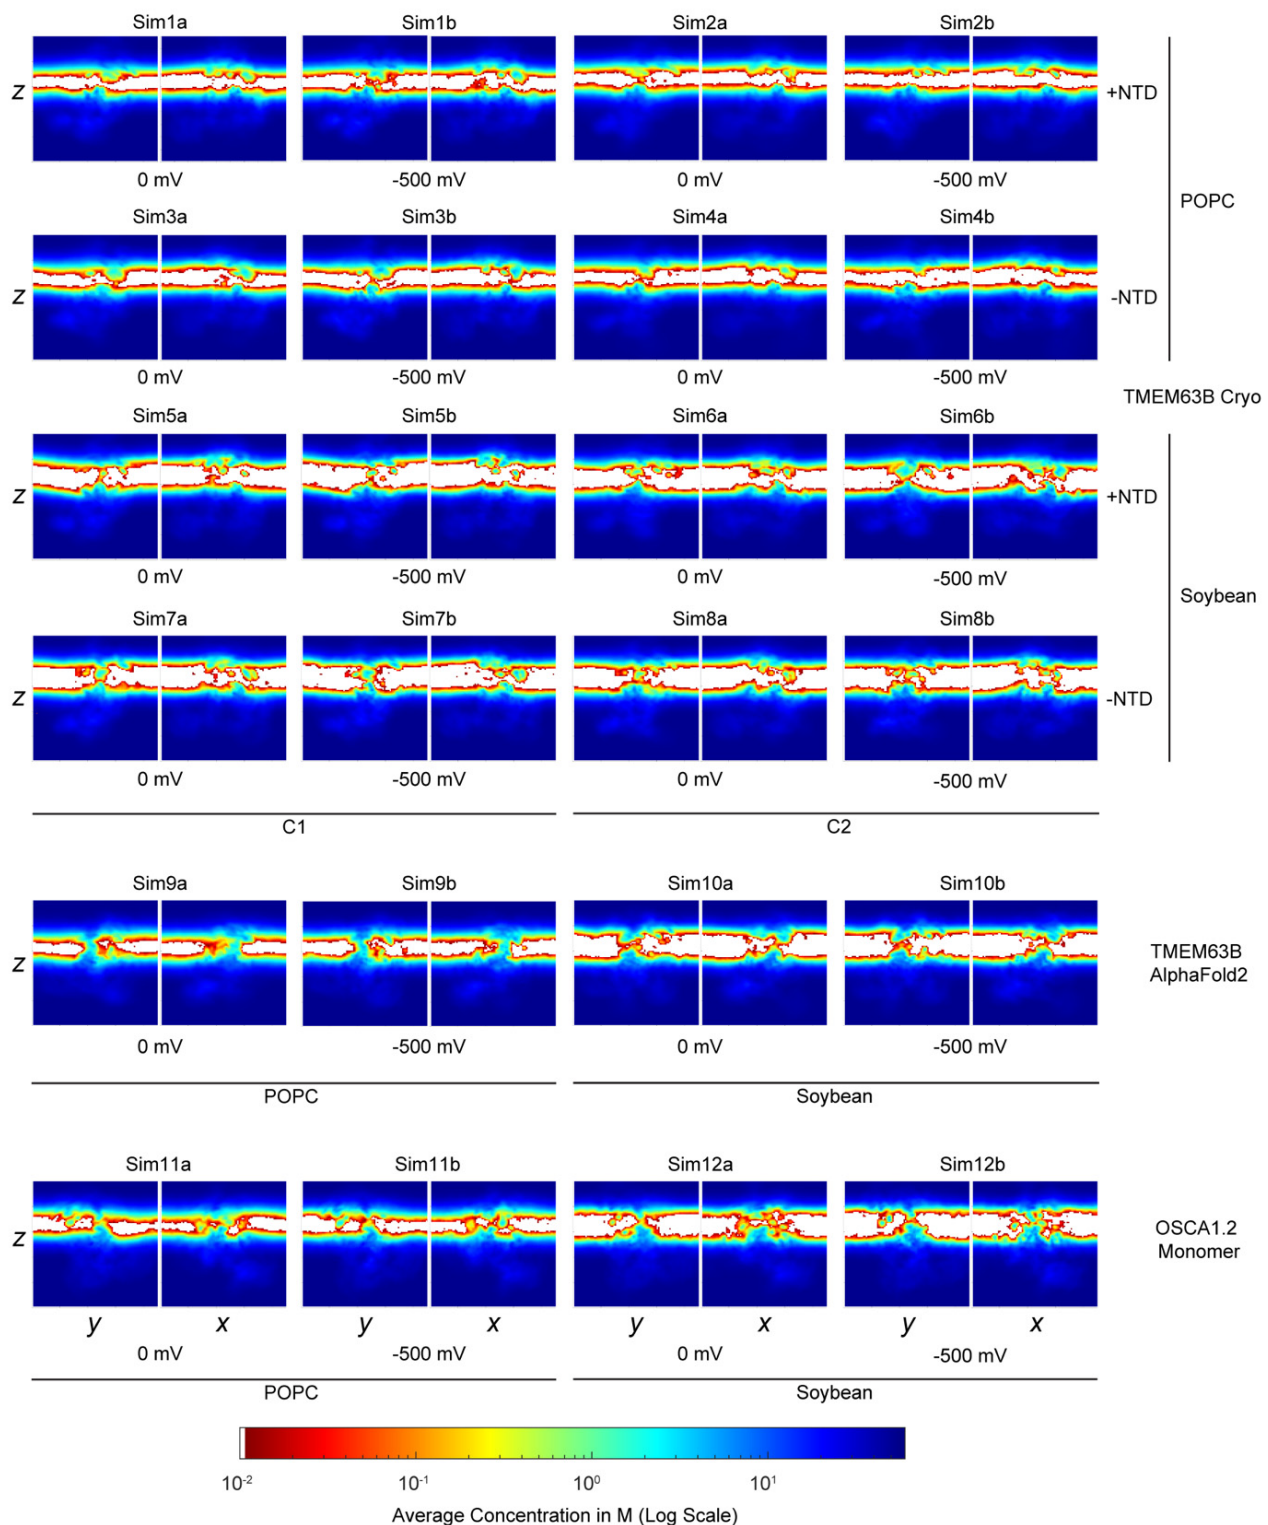

**Figure S7. Pore hydration in simulations of TMEM63B and OSCA1.2, related to Figure 3.**

Two dimensional slices showing time- and space-averaged water concentrations for all MD simulations listed in Table S2. Data shown in a logarithmic color scale to highlight transient hydration of putative pores.

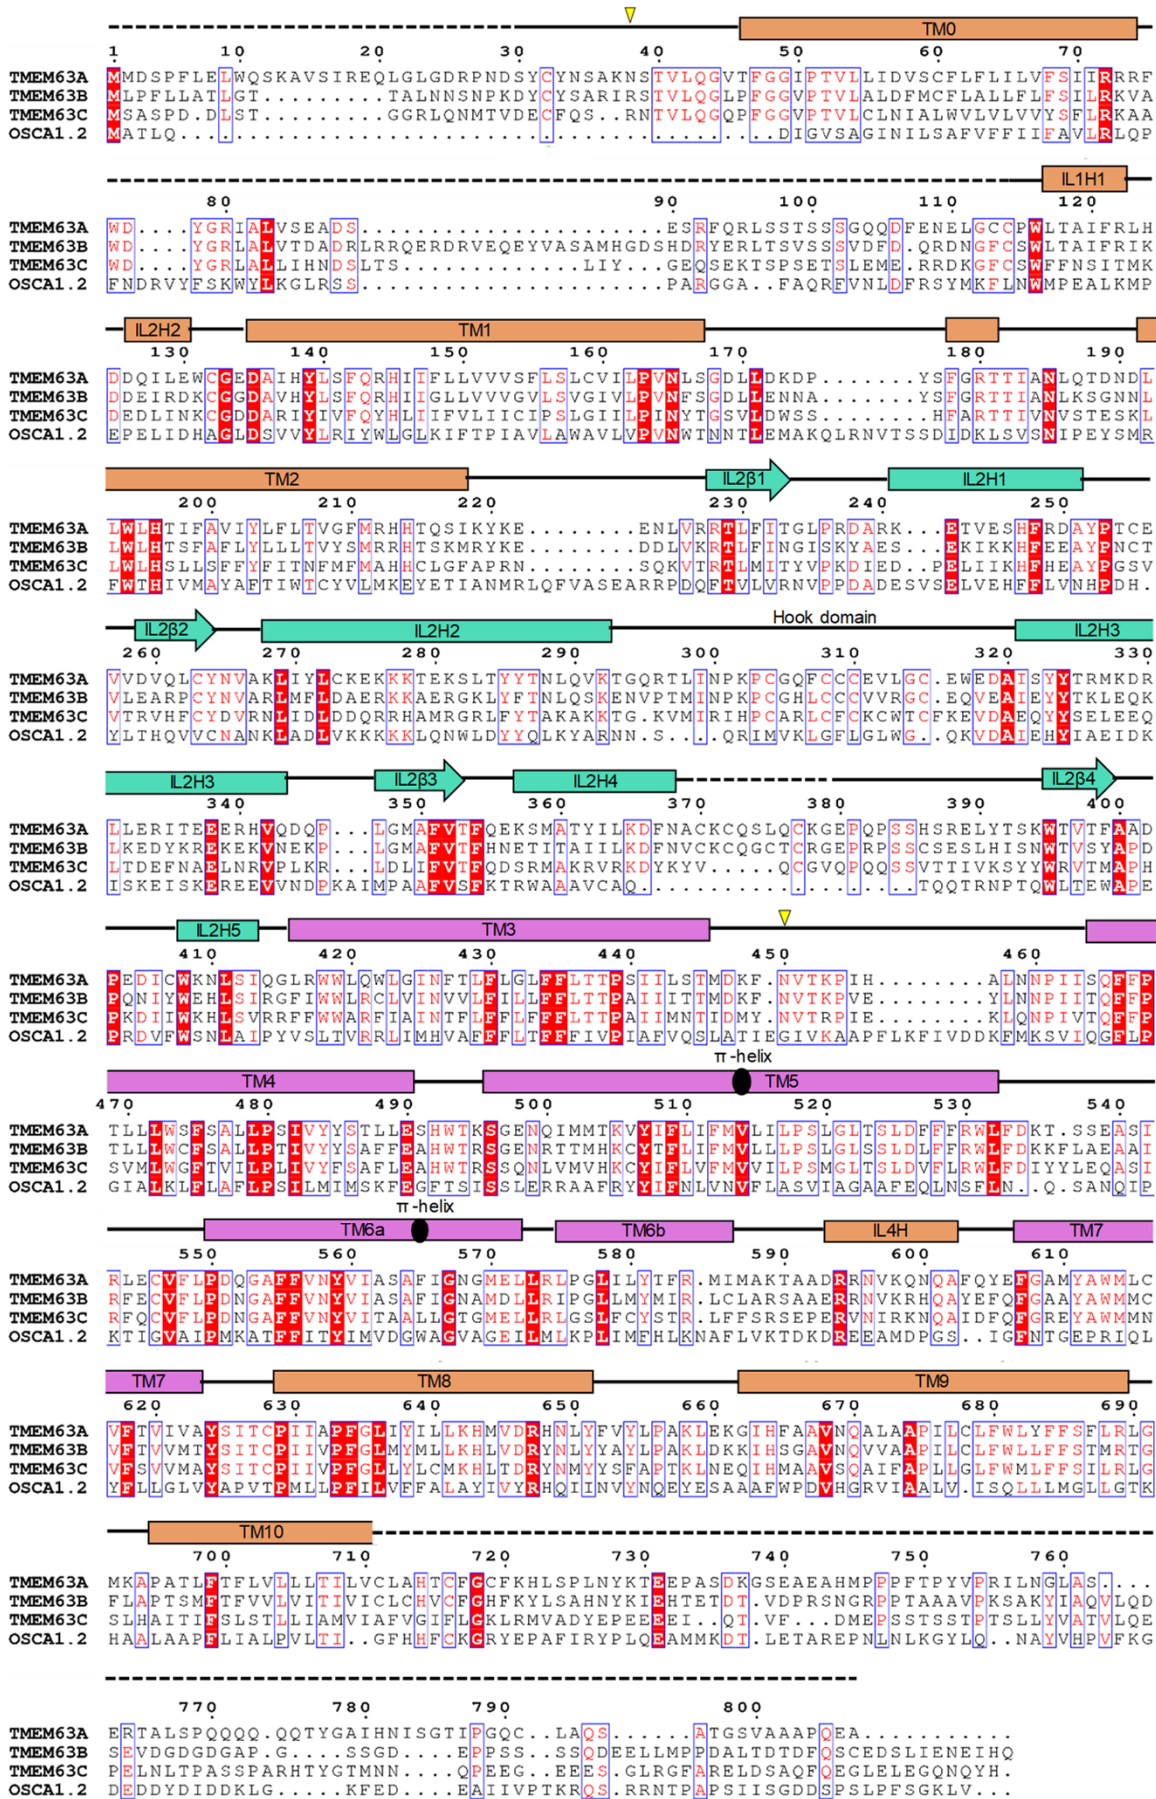

**Figure S8. Protein sequence alignment of TMEM63 proteins and OSCA1.2, related to Figures 2 and 7.**

Multiple sequence alignment was performed using ClustalW for human TMEM63A (UniProt Accession #: O94886), TMEM63B (Q5T3F8), TMEM63C (Q9P1W3) and *Arabidopsis thaliana* OSCA1.2 (Q5XEZ5). Secondary elements of human TMEM63A based on cryo-EM model is shown on the top, with the same color code as in Figure 2C. Unresolved regions in the cryo-EM model are indicated with dashed line. Two putative *N*-linked glycosylation sites (N38 and N450) in hTMEM63A are indicated with yellow triangles. The  $\pi$ -helix in TM5 and TM6 is labeled with a black oval.

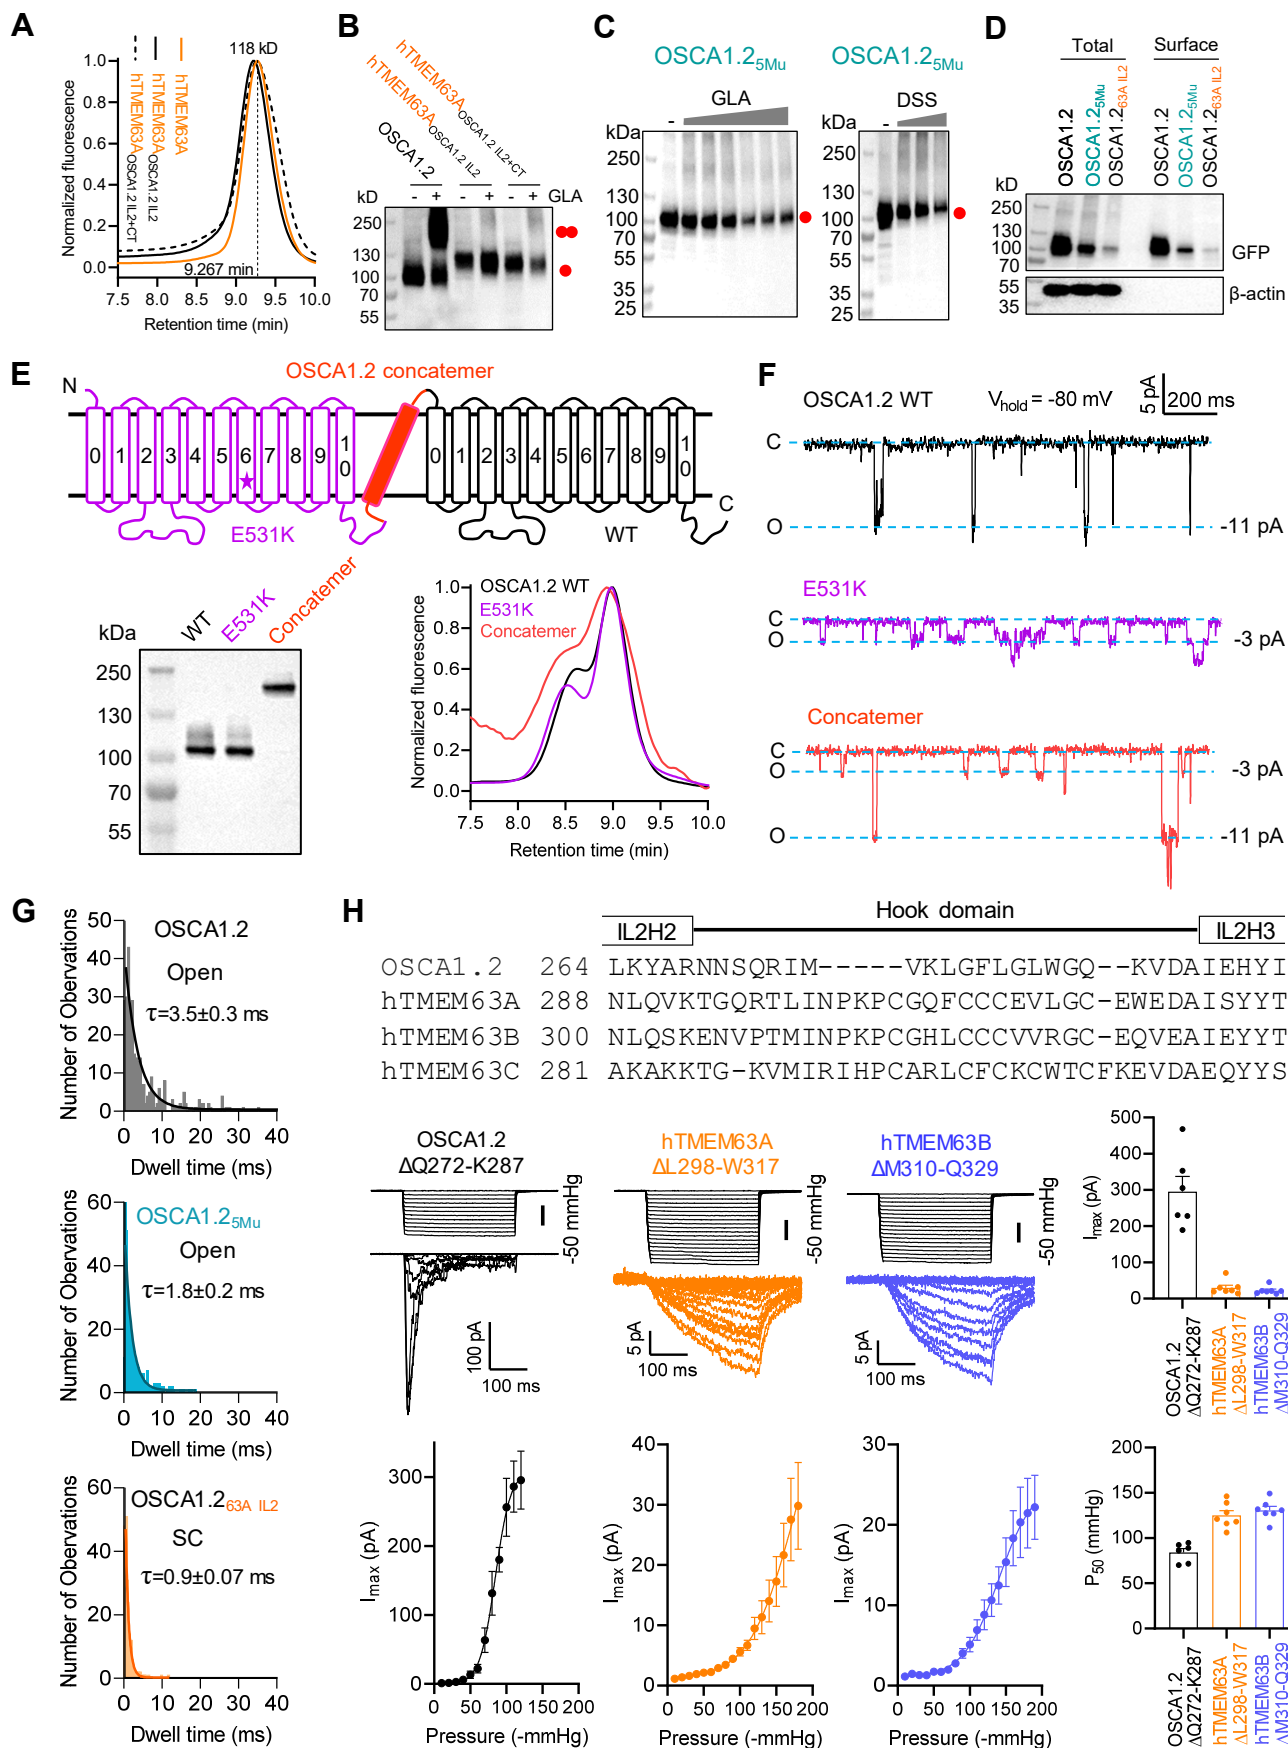

**Figure S9. Characterization of engineered OSCA1.2, TMEM63A and TMEM63B channels, related to Figures 5 and 6.**

(A and B) Representative FSEC traces (A) and western blot (B) of HEK293T cell lysate with overexpression of GFP-tagged constructs, as indicated. hTMEM63A<sub>OSCA1.2 IL2</sub>, IL2 of hTMEM63A were replaced with OSCA1.2 IL2; hTMEM63A<sub>OSCA1.2 IL2+CT</sub>, both IL2 and C-terminus of hTMEM63A were replaced with those of OSCA1.2. Cell lysates were treated without (-) or with (+) 10 mM GLA.

(C) Representative western blots of GFP-tagged OSCA1.2<sub>5Mu</sub> overexpressed in HEK293T cells. *Left*, cell lysates were treated with GLA as in Figure 5F; *Right*, intact cells were treated with DSS as in Figure 1D.

(D) Biotinylation assay detecting both the total expression and cell surface expression in HEK293T cells overexpressing GFP-tagged OSCA1.2, OSCA1.2<sub>5Mu</sub> and OSCA1.2<sub>63A IL2</sub>.

(E) *Upper*, diagram showing the design of OSCA1.2 concatemer. E531K mutant (purple, the mutation site is indicated with a star) and WT (black) protomers are connected via a single transmembrane helix of glycoporphin A (red); *Lower*, representative western blot (*Left*) and FSEC traces (*Right*) of HEK293T cell lysates with overexpression of GFP-tagged OSCA1.2 WT, E531K mutant or the concatemer.

(F) Representative traces of stretch-activated single-channel currents recorded at -80 mV. The closed (C) and open (O) states, and amplitude of unitary currents are indicated.

(G) Dwell time histograms for the fully open state of OSCA1.2 and OSCA1.2<sub>5Mu</sub>, and the assumed sub-conductance state of OSCA1.2<sub>63A IL2</sub>.

(H) *Upper*, sequence alignment of the hook domain; *Middle*, representative traces of stretch-activated currents (-80 mV) from HEK293T cells with overexpression of Hook-deleted OSCA1.2 ( $\Delta$ Q272-K287), hTMEM63A ( $\Delta$ L298-W317) or hTMEM63B ( $\Delta$ M310-Q329), and quantification of  $I_{\max}$ ; *Lower*, averaged pressure-response current curves fitted with a Boltzmann equation (OSCA1.2  $\Delta$ Q272-K287, N = 6; hTMEM63A  $\Delta$ L298-W317, N = 7; hTMEM63B  $\Delta$ M310-Q329, N = 7) and quantification of  $P_{50}$  from each individual patches.

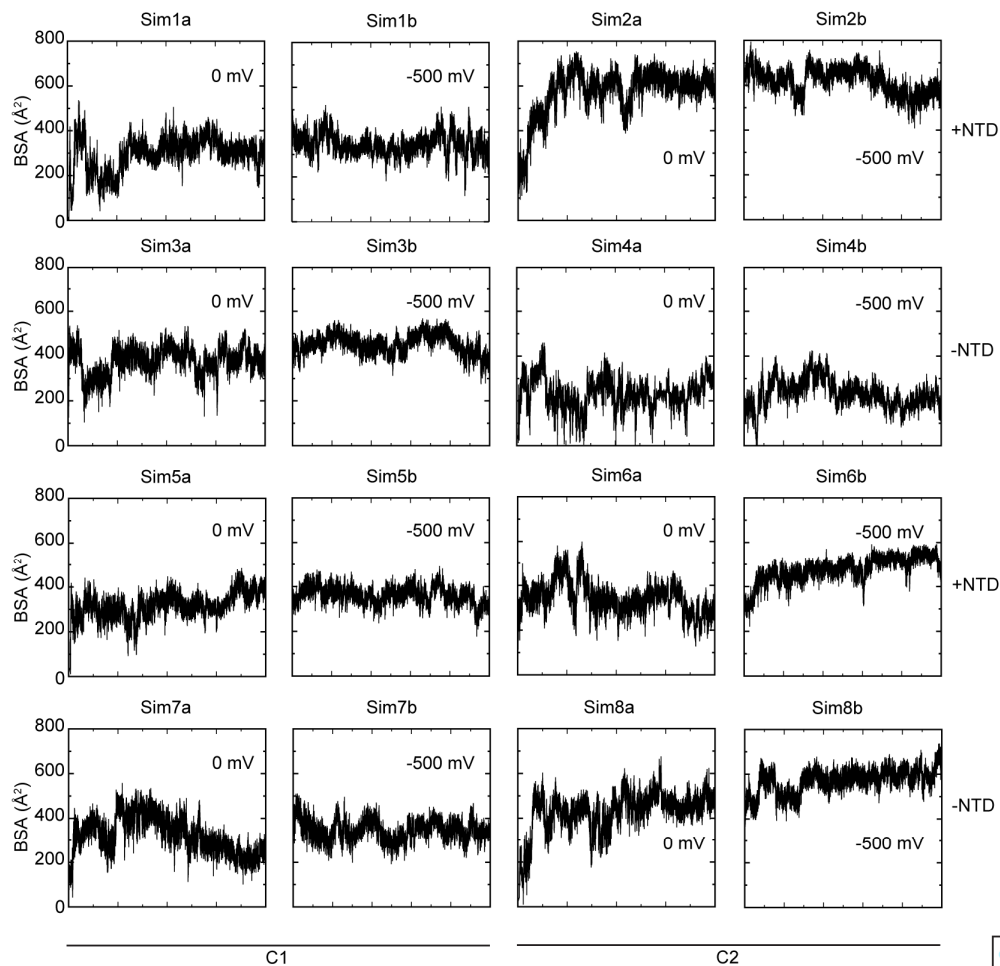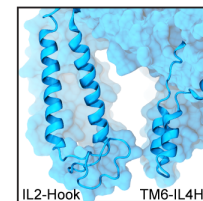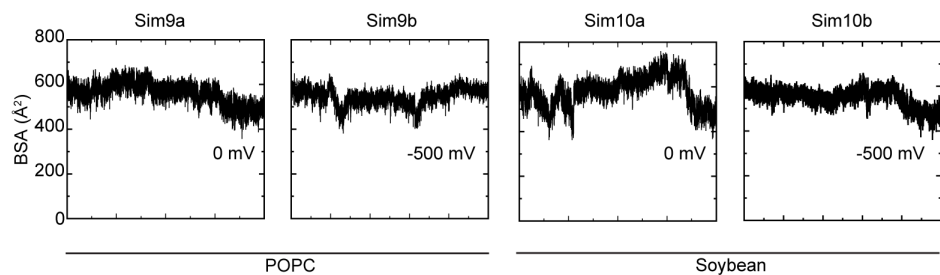

TMEM63B AlphaFold2

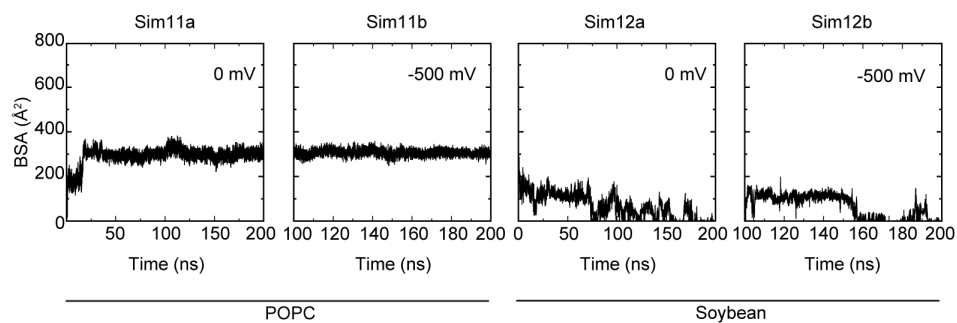

OSCA1.2 Monomer



**Figure S10. Predicted contacts between the IL2 domain and helices TM6b and ILH4, related to Figure 6.**

Buried surface area (BSA) is used to quantify the interaction between the IL2 hook and the TM6b and IL4H region near the bottom of the pore for TMEM63B and OSCA1.2 models. Inset image shows top view of this interaction in the TMEM63B cryo-EM model used for simulations (middle right). Initial BSA values were  $\sim 20 \text{ \AA}^2$  for the TMEM63B cryo-EM model,  $\sim 600 \text{ \AA}^2$  for the TMEM63B AlphaFold2 model, and  $\sim 260 \text{ \AA}^3$  for OSCA1.2. Values shown for all simulations listed in Table S2.

**Table S1. Cryo-EM data collection, refinement and validation statistics , related to STAR Methods.**

|                                                     | TMEM63A<br>in nanodiscs<br>(EMD-28153)<br>(PDB 8EHW) | TMEM63A<br>in LMNG | TMEM63B<br>in nanodiscs | TMEM63B<br>in LMNG<br>(EMD-28154)<br>(PDB 8EHX) |
|-----------------------------------------------------|------------------------------------------------------|--------------------|-------------------------|-------------------------------------------------|
| <b>Data collection/processing</b>                   |                                                      |                    |                         |                                                 |
| Magnification                                       | 105,000                                              | 36,000             | 105,000                 | 105,000                                         |
| Voltage (kV)                                        | 300                                                  | 200                | 300                     | 300                                             |
| Electron exposure (e <sup>-</sup> /Å <sup>2</sup> ) | 50.705                                               | 52.563             | 53.048                  | 53.048                                          |
| Defocus range (μm)                                  | -1 to -2                                             | -1.4 to -2.5       | -0.8 to -2.1            | -0.8 to -2.1                                    |
| Number of frames                                    | 50                                                   | 50                 | 50                      | 50                                              |
| Pixel size (Å)                                      | 0.825                                                | 1.1                | 0.825                   | 0.825                                           |
| Micrographs (no.)                                   | 10,836                                               |                    |                         | 8,640                                           |
| Initial particles (no.)                             | 4,552,788                                            |                    |                         | 2,433,802                                       |
| Final particles (no.)                               | 198,144                                              |                    |                         | 64,399                                          |
| Symmetry imposed                                    | C1                                                   |                    |                         | C1                                              |
| Map resolution (Å)                                  | 3.82                                                 |                    |                         | 3.62                                            |
| FSC threshold                                       | 0.143                                                |                    |                         | 0.143                                           |
| Map sharpening B factor (Å <sup>2</sup> )           | -198.6                                               |                    |                         | -131.2                                          |
| <b>Refinement</b>                                   |                                                      |                    |                         |                                                 |
| Initial model                                       | AlphaFold 2                                          |                    |                         | AlphaFold 2                                     |
| Model resolution (Å)                                | 4.03                                                 |                    |                         | 3.87                                            |
| FSC threshold                                       | 0.5                                                  |                    |                         | 0.5                                             |
| Model composition                                   |                                                      |                    |                         |                                                 |
| Non-hydrogen atoms                                  | 5150                                                 |                    |                         | 5153                                            |
| Protein residues                                    | 630                                                  |                    |                         | 631                                             |
| R.m.s. deviations                                   |                                                      |                    |                         |                                                 |
| Bond lengths (Å)                                    | 0.003                                                |                    |                         | 0.003                                           |
| Bond angles (°)                                     | 0.769                                                |                    |                         | 0.648                                           |
| <b>Validation</b>                                   |                                                      |                    |                         |                                                 |
| MolProbity score                                    | 2.19                                                 |                    |                         | 2.13                                            |
| Clashscore                                          | 15.33                                                |                    |                         | 13.01                                           |
| Poor rotamers (%)                                   | 0.18%                                                |                    |                         | 0                                               |
| Ramachandran plot                                   |                                                      |                    |                         |                                                 |
| Favored (%)                                         | 91.67%                                               |                    |                         | 91.33%                                          |
| Allowed (%)                                         | 8.33%                                                |                    |                         | 8.51%                                           |
| Disallowed (%)                                      | 0                                                    |                    |                         | 0.16%                                           |

**Table S2. Simulations summary for each system, related to STAR Methods.**

C1 and C2 indicate the conformation of IL1 predicted by AF2 multimer prediction and monomer prediction, respectively.

| Label                 | Protein                     | Membrane | NTD | IL1  | Voltage (mV) | Length (ns)    | Start           | # atoms         | Dimensions (Å <sup>3</sup> ) |                 |                 |
|-----------------------|-----------------------------|----------|-----|------|--------------|----------------|-----------------|-----------------|------------------------------|-----------------|-----------------|
| Sim1a                 | TMEM63B (Cryo)              | POPC     | +   | C1   | 0            | 200            | -               | 205,840         | 133 × 133 × 136              |                 |                 |
| Sim1b                 |                             |          |     |      | -500         | 100            | Sim1a (100 ns)  |                 |                              |                 |                 |
| Sim2a                 |                             |          |     | C2   | 0            | 200            | -               |                 |                              | 211,763         | 135 × 135 × 142 |
| Sim2b                 |                             |          |     |      | -500         | 100            | Sim2a (100 ns)  |                 |                              |                 |                 |
| Sim3a                 |                             |          | C1  | 0    | 200          | -              | 209,874         | 135 × 135 × 138 |                              |                 |                 |
| Sim3b                 |                             |          |     | -500 | 100          | Sim3a (100 ns) |                 |                 |                              |                 |                 |
| Sim4a                 |                             |          | C2  | 0    | 200          | -              | 209,954         | 133 × 133 × 136 |                              |                 |                 |
| Sim4b                 |                             |          |     | -500 | 100          | Sim4a (100 ns) |                 |                 |                              |                 |                 |
| Sim5a                 |                             | Soybean  | +   | C1   | 0            | 200            | -               | 203,823         | 133 × 133 × 136              |                 |                 |
| Sim5b                 |                             |          |     |      | -500         | 100            | Sim5a (100 ns)  |                 |                              |                 |                 |
| Sim6a                 |                             |          |     | C2   | 0            | 200            | -               |                 |                              | 205,514         | 135 × 135 × 142 |
| Sim6b                 |                             |          |     |      | -500         | 100            | Sim6a (100 ns)  |                 |                              |                 |                 |
| Sim7a                 |                             |          | C1  | 0    | 200          | -              | 203,993         | 135 × 135 × 142 |                              |                 |                 |
| Sim7b                 |                             |          |     | -500 | 100          | Sim7a (100 ns) |                 |                 |                              |                 |                 |
| Sim8a                 |                             |          | C2  | 0    | 200          | -              | 204,024         | 133 × 133 × 136 |                              |                 |                 |
| Sim8b                 |                             |          |     | -500 | 100          | Sim8a (100 ns) |                 |                 |                              |                 |                 |
| Sim9a                 | TMEM63B (AlphaFold2)        | POPC     | +   | C2   | 0            | 200            | -               | 200,163         | 135 × 135 × 135              |                 |                 |
| Sim9b                 |                             |          |     |      | -500         | 100            | Sim9a (100 ns)  |                 |                              |                 |                 |
| Sim10a                |                             | Soybean  |     |      | 0            | 200            | -               | 209,874         | 135 × 135 × 135              |                 |                 |
| Sim10b                |                             |          |     |      | -500         | 100            | Sim10a (100 ns) |                 |                              |                 |                 |
| Sim11a                | OSCA1.2 Monomer (PDB: 6MGV) | POPC     |     | -    | -            | 0              | 200             | -               | 187,941                      | 130 × 133 × 132 |                 |
| Sim11b                |                             |          |     |      |              | -500           | 100             | Sim11a (100 ns) |                              |                 |                 |
| Sim12a                |                             | Soybean  |     |      | 0            | 200            | -               | 194,793         | 135 × 135 × 132              |                 |                 |
| Sim12b                |                             |          |     |      | -500         | 100            | Sim12a (100 ns) |                 |                              |                 |                 |
| Total Simulation Time |                             |          |     |      |              | 3,600          |                 |                 |                              |                 |                 |
